# Supplementary material
Source: Springer Nature journal article supplement (https://www.springermedizin.de/resource/supplementary/12955_2007_387_MOESM3_ESM.pdf/9560294)

● Emotional Function, Placebo    ■ Emotional Function, TPM 100 mg/d

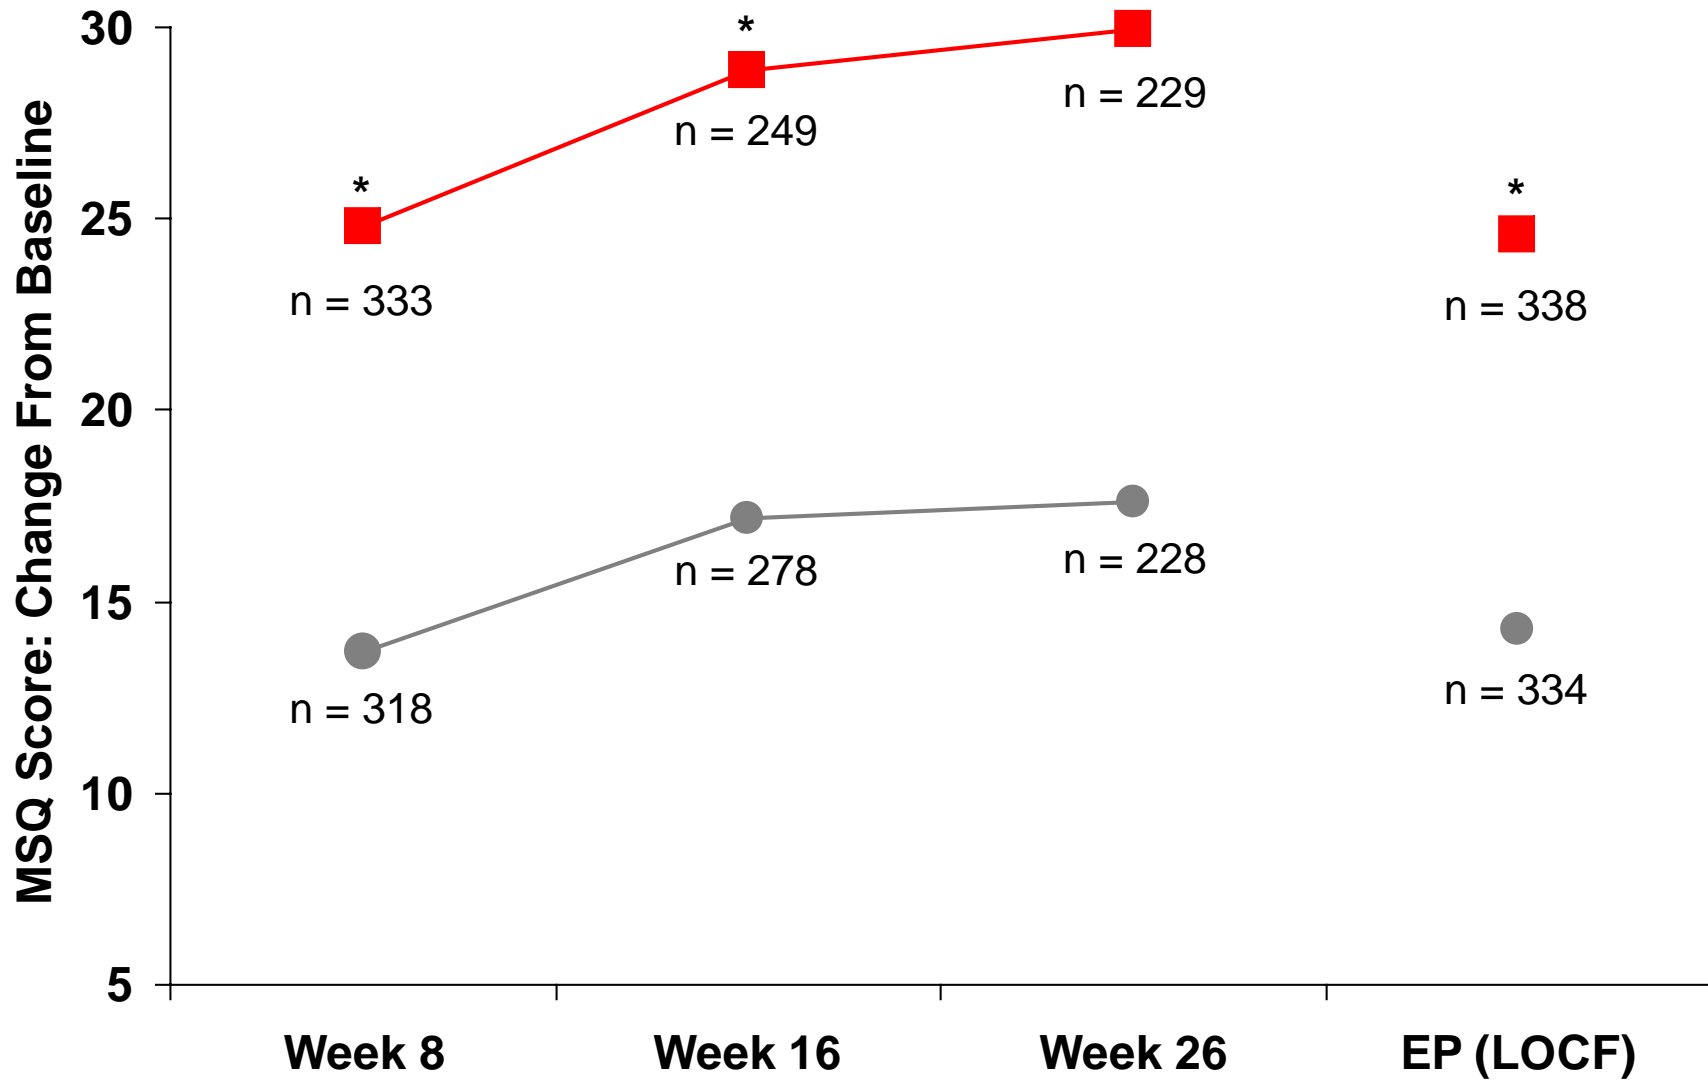

Supplement: MOESM3 [file 9560294]
